# Supplementary material for: Astaxanthin Exerts Anabolic Effects via Pleiotropic Modulation of the Excitable Tissue
Source: MDPI journal article supplement (doi:10.3390/ijms23020917), 2022-01-14
Supplement: s1 [file s1]

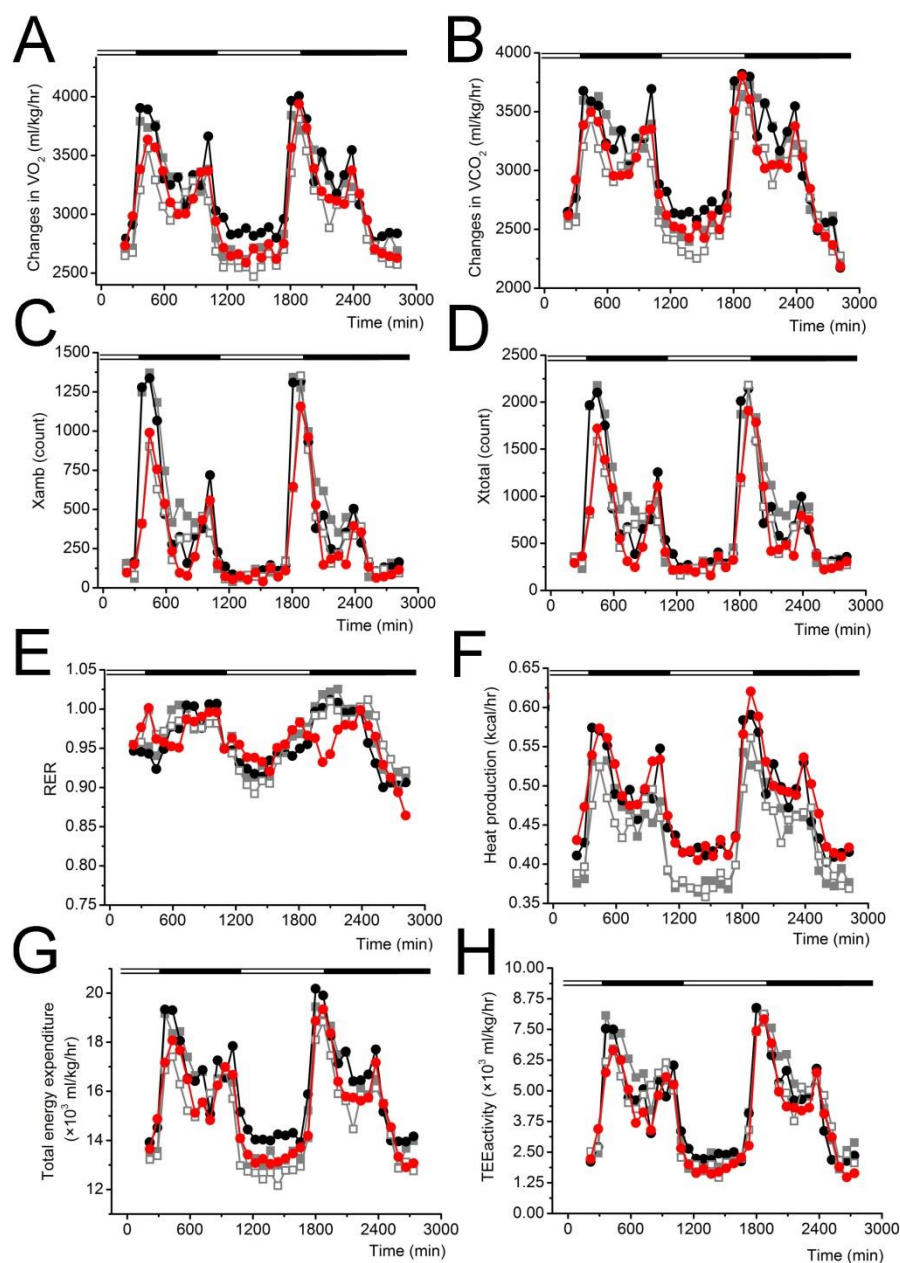

**Figure S1.** Changes of in vivo metabolic parameters before and following astaxanthin feeding. Continuous changes of  $\text{VO}_2$  (A),  $\text{VCO}_2$  (B), Xamb (C), Xtotal (D), RER (E), and heat production (F). Data from 4 measured points (equal with  $4 \times 18$  minutes) were averaged for all animals and time course of the aforementioned parameters were plotted as a function of time. Total energy expenditure (TEE) was calculated by multiplying CV and  $\text{VO}_2$  and plotted as a function of time (G). As this parameter contain resting/basal metabolic rate and activity related energy expenditure, we determined resting metabolic rate by averaging the ten minima values of energy expenditure within the 48-hour measurement. RMR was subtracted from TEE giving the TEE<sub>activity</sub> values of the different animal groups (H). Black lines above the graphs indicate periods in darkness, whereas hollow lines represent periods of light.

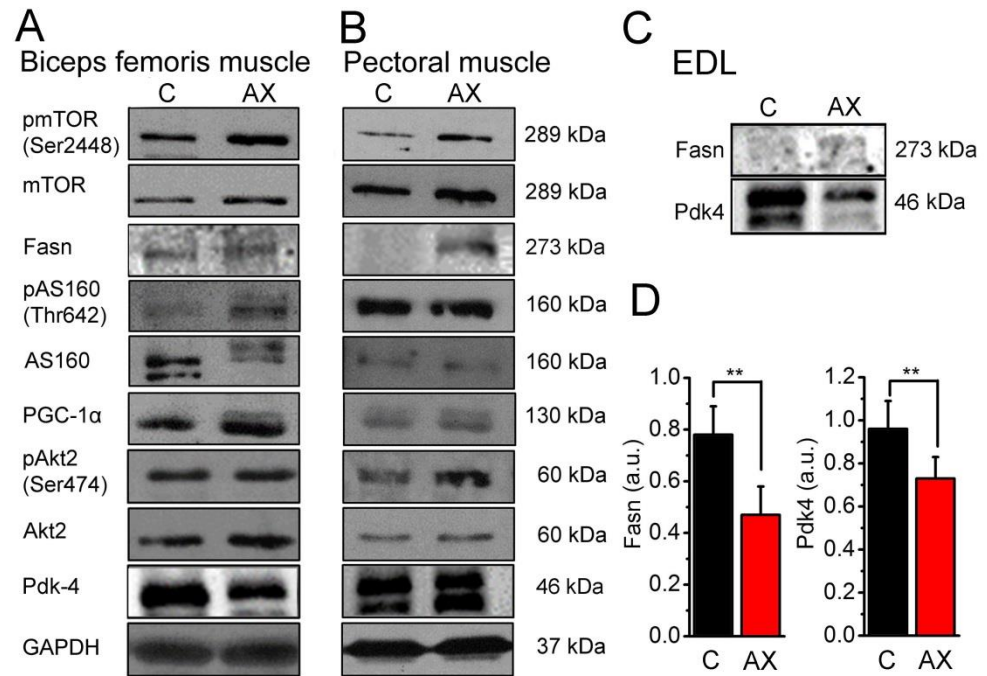

**Figure S2.** Effects of astaxanthin feeding on the levels of signaling proteins in biceps femoris, pectoral and extensor digitorum longus muscles. **(A)** Representative Western blot images show the levels of phospho(Ser2448)-mTOR, mTOR, Fasn, phospho(Thr642)-AS160, AS160, PGC-1 $\alpha$ , phospho(Ser474)-Akt2, Akt2 and Pdk-4 in control samples (C) and in astaxanthin-treated mice (AX). GAPDH was used as a loading control. **(B)** Representative Western blot images from samples obtained from pectoralis muscles show the levels of phospho(Ser2448)-mTOR, mTOR, Fasn, phospho(Thr642)-AS160, AS160, PGC-1 $\alpha$ , phospho(Ser474)-Akt2, Akt2 and Pdk4 in control samples (C) and AX treated mice, respectively. GAPDH was used as a loading control. **(C)** Representative Western blot experiments from extensor digitorum longus (EDL) muscle show significantly decreased Fasn and Pdk4 protein levels. **(D)** Statistical analysis of changes in Fasn and Pdk4 in EDL (black, C: control; red, AX: astaxanthin).

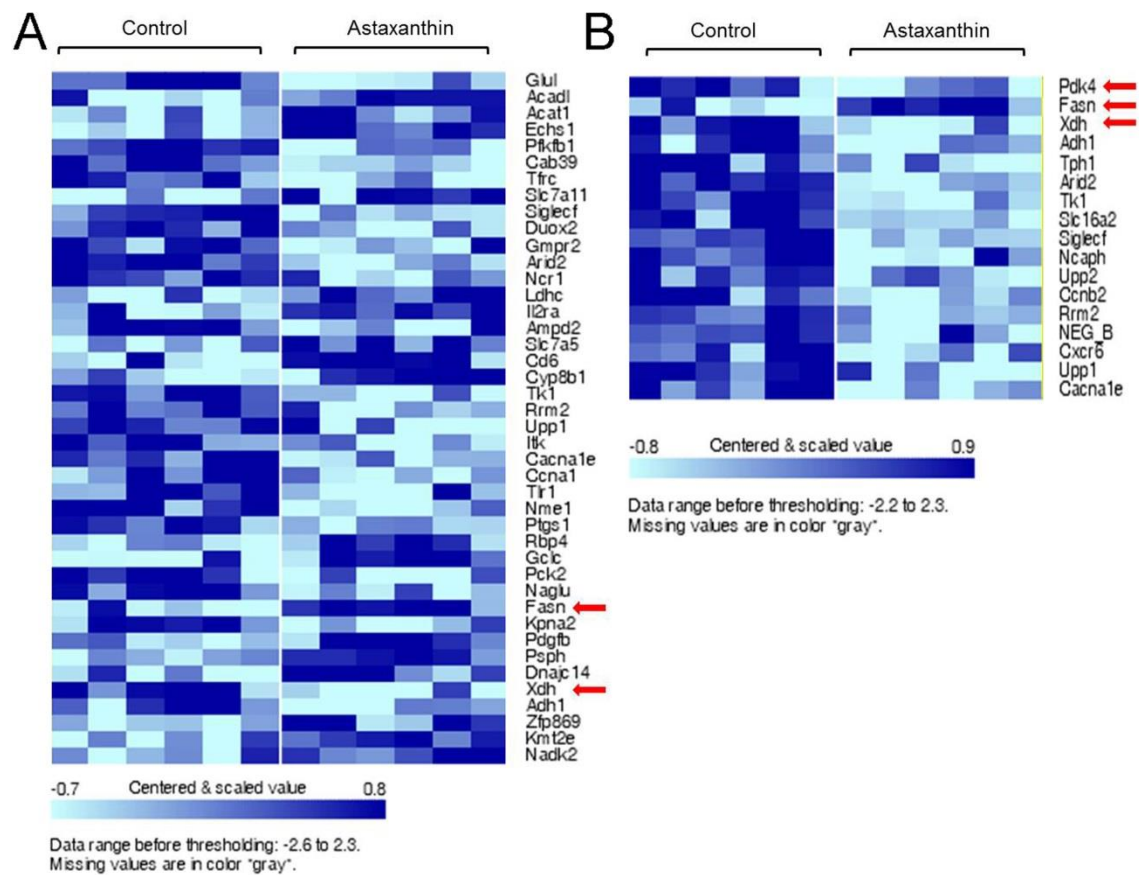

**Figure S3.** Clustered heatmap of significantly expressed genes in samples from EDL muscles. **(A)** Clustered heatmap following quantile normalization; arrays grouped by class. **(B)** Clustered heatmap of significantly expressed genes normalized to housekeeping genes; arrays grouped by class. Arrows indicate altered gene expression in AX treated samples compared to the controls.

**Table S1.** Metabolic parameters measured during 48 h before and after the 4 weeks of special feeding in control and astaxanthin-treated mice. Significance was calculated between control and astaxanthin-treated groups at different periods of the day and accepted to be significantly different, when  $p < 0.05$ .

|                                |        | 1 <sup>st</sup> Period (Dark) |                      | 2 <sup>nd</sup> Period (Light) |                      | 3 <sup>rd</sup> Period (Dark) |                      | 4 <sup>th</sup> Period (Light) |                     |
|--------------------------------|--------|-------------------------------|----------------------|--------------------------------|----------------------|-------------------------------|----------------------|--------------------------------|---------------------|
|                                |        | Ctrl                          | Astx                 | Ctrl                           | Astx                 | Ctrl                          | Astx                 | Ctrl                           | Astx                |
| VO <sub>2</sub><br>(ml/kg/hr)  | Before | 3395.9 ± 32.1                 | 3430 ± 32.3          | 2747.8 ± 28.5                  | <b>2927.9 ± 28.6</b> | 3383.5 ± 32.91                | <b>3466.5 ± 32.5</b> | 2735.2 ± 37.4                  | 2816.3 ± 38.1       |
|                                | After  | 3208.2 ± 28.9                 | <b>3291.2 ± 29.9</b> | 2588.2 ± 24.5                  | <b>2699.9 ± 23.5</b> | 3244.6 ± 31.3                 | <b>3369.9 ± 30.9</b> | 2660.2 ± 34.7                  | 2711.2 ± 33.9       |
| VCO <sub>2</sub><br>(ml/kg/hr) | Before | 3333.4 ± 32.9                 | 3350.6 ± 33.1        | 2584.9 ± 31.0                  | <b>2746.6 ± 30.6</b> | 3386.9 ± 35.2                 | 3422.3 ± 33.7        | 2468.2 ± 49.2                  | 2463.9 ± 53.9       |
|                                | After  | 3144.0 ± 30.2                 | <b>3218.9 ± 31.3</b> | 2412.5 ± 27.7                  | <b>2562.2 ± 24.9</b> | 3226.3 ± 32.7                 | 3271.7 ± 32.9        | 2438.6 ± 45.6                  | 2423.6 ± 44.3       |
| X <sub>amb</sub><br>(counts)   | Before | 692.1 ± 37.1                  | <b>594.3 ± 35.5</b>  | 133.9 ± 16.9                   | 156.5 ± 18.2         | 656.9 ± 37.6                  | <b>563.2 ± 33.9</b>  | 116.6 ± 20.1                   | 131.0 ± 18.5        |
|                                | After  | 440.5 ± 26.2                  | 428.3 ± 27.8         | 93.2 ± 9.3                     | 84.4 ± 8.4           | 509.7 ± 32.9                  | 472.3 ± 29.3         | 108.7 ± 13.8                   | 88.5 ± 12.3         |
| X <sub>total</sub><br>(counts) | Before | 1198.8 ± 53.2                 | <b>1049.3 ± 50.9</b> | 326.5 ± 27.1                   | 377.9 ± 29.3         | 1164.1 ± 54.4                 | <b>1024.6 ± 46.9</b> | 292.6 ± 35.3                   | 312.6 ± 33.6        |
|                                | After  | 876.6 ± 40.7                  | 858.4 ± 43.9         | 267.8 ± 17.9                   | 264.8 ± 16.7         | 960.2 ± 49.0                  | 924.7 ± 45.6         | 287.7 ± 26.0                   | 263.6 ± 25.1        |
| RER                            | Before | 0.92 ± 0.003                  | 0.97 ± 0.003         | 0.94 ± 0.004                   | 0.93 ± 0.003         | 0.99 ± 0.002                  | <b>0.98 ± 0.002</b>  | 0.92 ± 0.005                   | 0.9 ± 0.005         |
|                                | After  | 0.98 ± 0.003                  | 0.97 ± 0.003         | 0.93 ± 0.004                   | 0.95 ± 0.003         | 0.99 ± 0.002                  | 0.97 ± 0.003         | 0.93 ± 0.004                   | 0.91 ± 0.004        |
| Heat production<br>(kcal/hr)   | Before | 0.48 ± 0.005                  | <b>0.51 ± 0.005</b>  | 0.38 ± 0.004                   | <b>0.43 ± 0.005</b>  | 0.48 ± 0.005                  | <b>0.52 ± 0.005</b>  | 0.38 ± 0.006                   | <b>0.41 ± 0.006</b> |
|                                | After  | 0.47 ± 0.004                  | <b>0.52 ± 0.005</b>  | 0.38 ± 0.004                   | <b>0.42 ± 0.004</b>  | 0.48 ± 0.005                  | <b>0.53 ± 0.005</b>  | 0.39 ± 0.005                   | <b>0.42 ± 0.005</b> |
| Total sleep<br>time (min)      | Before |                               |                      | 156.0 ± 8.4                    | 137.8 ± 15.4         | 51.6 ± 7.5                    | 54.8 ± 9.8           | 207.4 ± 14.8                   | 192.4 ± 21.1        |
|                                | After  |                               |                      | 152.1 ± 15.1                   | 137.5 ± 11.7         | 75.4 ± 10.7                   | 55.1 ± 7.5           | 234.8 ± 25.3                   | 192.4 ± 13.4        |
